# Supplementary material for: Swelling, Rupture and Endosomal Escape of Biological Nanoparticles Per Se and Those Fused with Liposomes in Acidic Environment
Source: MDPI journal article supplement (doi:10.3390/pharmaceutics16050667), 2024-05-16
Supplement: s1 [file s1]

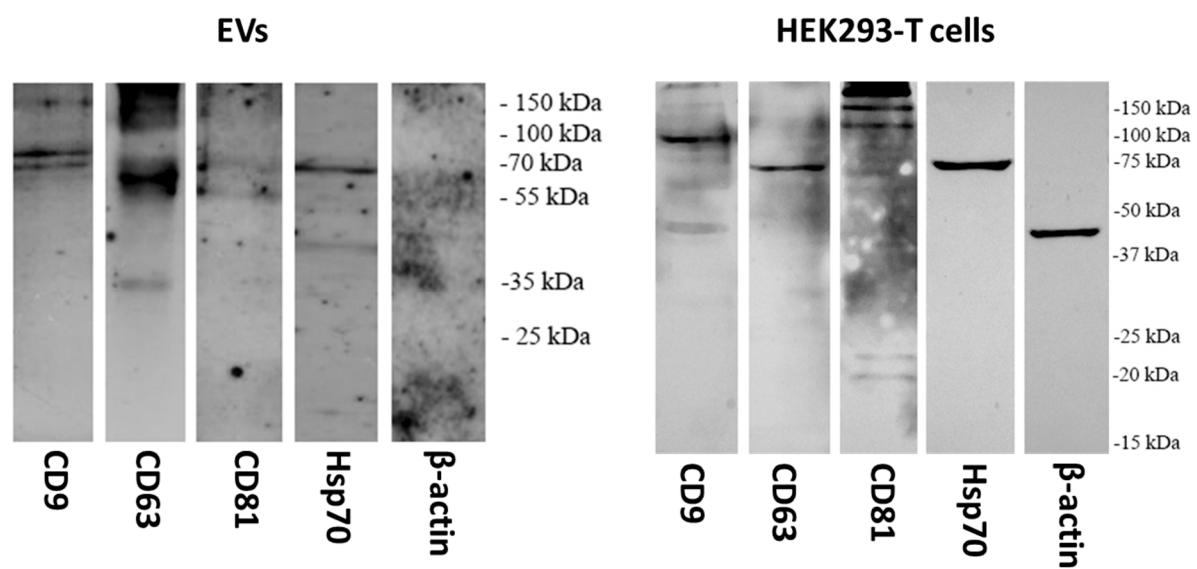

**Figure S1. Protein expression analysis.** Analysis of EVs-specific protein biomarkers (CD9, CD63, CD81, Hsp70) and  $\beta$ -actin as housekeeping control in isolated EVs and HEK293-T cells.
